# Supplementary material for: Exploring T Cell Reactivity to Gliadin in Young Children with Newly Diagnosed Celiac Disease
Source: PubMed Central journal article supplement (PMC3958769; doi:10.1155/2014/927190), 2014-03-03
Supplement: 927190.f1.pdf [file 927190.f1.pdf]

## Supplementary Data

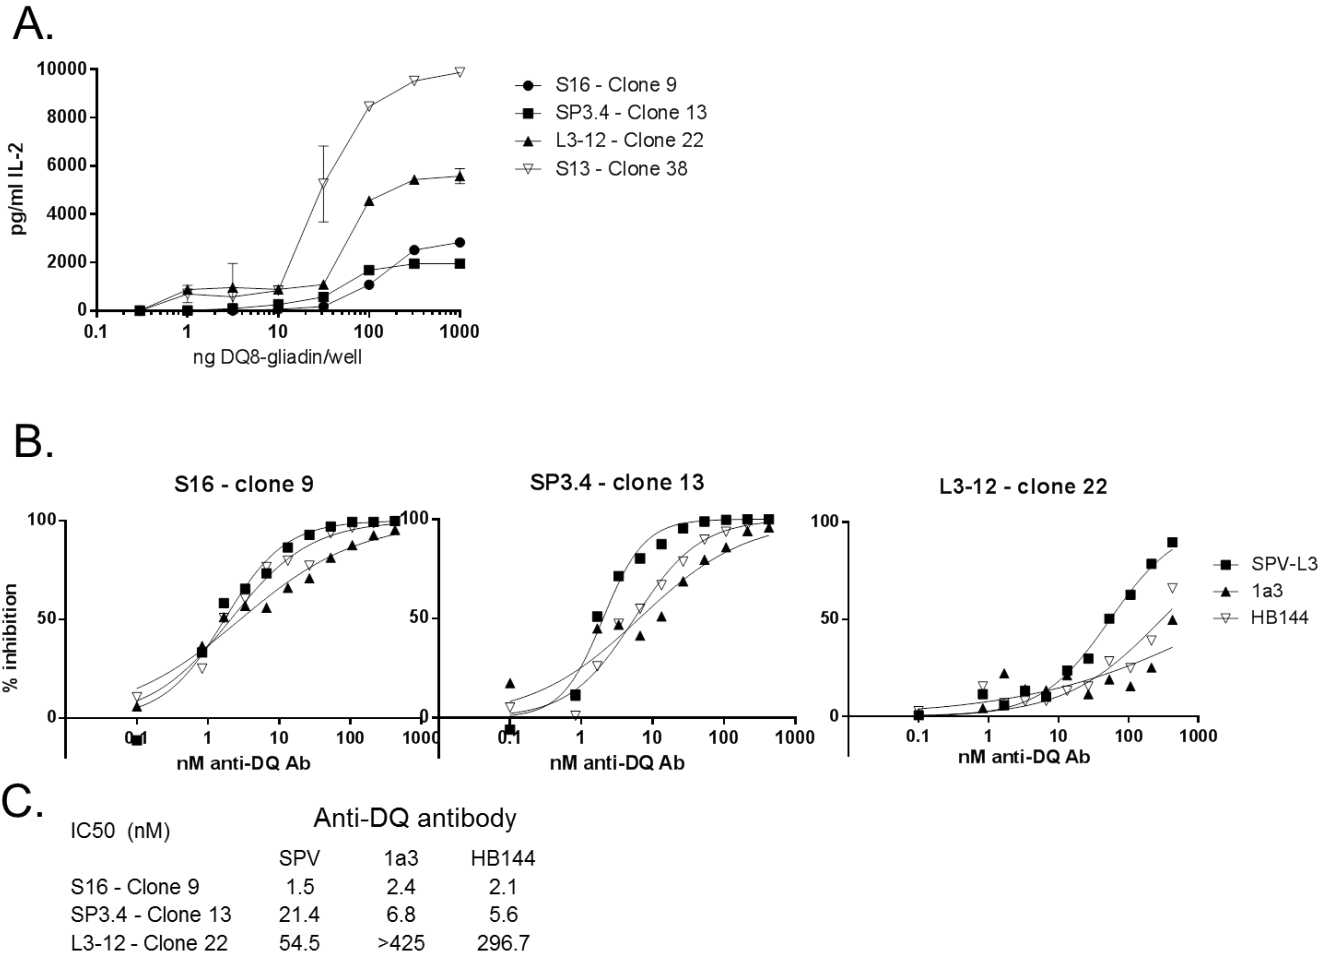

**Supplemental Figure 1. Gliadin/DQ8 recombinant protein stimulates different DQ8 restricted T cell clones.** (A) Four HLA-DQ8 restricted T cell clones produce robust amounts of IL-2 in response to the deamidated  $\alpha$ -gliadin/DQ8 recombinant protein. (B) The T cell response can be blocked with different commercial DQ monoclonal antibodies with the (C) IC<sub>50</sub> values depicted for each T cell clone and DQ antibody.
